# Supplementary material for: Aktueller Stand der rhythmologischen Ausbildung in Deutschland
Source: Springer Nature journal article supplement (doi:10.1007/s00399-020-00717-4), 2020-09-01
Supplement: MOESM1 [file 18337278]

## Nationales Survey zur kardiologischen Ausbildung in Deutschland

Liebe Kolleginnen und Kollegen,

für ein besseres Verständnis der kardiologischen Ausbildung haben wir diese Umfrage entworfen. Die Bearbeitung dauert nur ca. 5 Minuten und ist freiwillig und anonym.

Herzlichen Dank für die Teilnahme!

Dr. med. K. Willy Dr. med. P. Müller PD Dr. David Duncker

1. Was ist Ihr Geschlecht?

- Weiblich
- Männlich
- Divers

2. In welchem Jahr sind Sie geboren? (Geben Sie das 4-stellige Geburtsjahr an, z. B. 1976)

3. In welchem Ausbildungsstand befinden Sie sich?

- Medizinstudent/in
- Facharzt/Fachärztin
- Assistenzarzt/ärztin im 1.-3. Weiterbildungsjahr
- Oberarzt/ärztin
- Assistenzarzt/ärztin im 4.-6. Weiterbildungsjahr

4. Wo sind Sie überwiegend beschäftigt?

- Universitätsklinik
- Krankenhaus in privater Trägerschaft
- Kirchliches Krankenhaus
- Kardiologische Praxis
- Krankenhaus in öffentlicher Trägerschaft

5. Hat Ihre Klinik eine eigenständige rhythmologische Abteilung?

- Ja
- Nein

6. Welches kardiologische Leistungsspektrum bietet Ihre Klinik? (Mehrfachnennung möglich)

- Kardiales MRT mit ärztlicher kardiologischer Beteiligung
- Kardiales CT mit ärztlicher kardiologischer Beteiligung
- Sportkardiologie
- Erwachsene mit angeborenen Herzerkrankungen
- Kinderkardiologie
- Spezialisierte Kompetenz in der Herzinsuffizienz
- Koronarangiographie/PCI
- Interventionelle Herzklappentherapie
- Invasive Elektrophysiologie
- Operative Devicetherapie

7. Nach welchem Prinzip erfolgen die Rotationen in Ihrer Klinik Ihrer Meinung nach am ehesten?

- Zufällig
- Strukturiert

- Leistungsorientiert (z.B. Honorierung guter Publikationsleistungen)

8. Wie zufrieden sind Sie mit Ihrer kardiologischen Gesamtweiterbildung insgesamt?

- Sehr zufrieden
- Eher zufrieden
- Weder zufrieden noch unzufrieden
- Eher unzufrieden
- Sehr unzufrieden

9. Die rhythmologische Ausbildung in Ihrer Klinik nimmt Ihrer Meinung nach einen angemessenen Stellenwert ein?

- Stimme voll zu
- Stimme eher zu
- Kann ich nicht genau sagen
- Stimme eher nicht zu
- Stimme gar nicht zu

10. Welche Aspekte beinhaltet die rhythmologische Ausbildung in Ihrer Klinik? (Mehrfachnennung möglich)

- Betreuung rhythmologischer stationärer Patienten
- Patientenversorgung in einer rhythmologischen Ambulanz
- Strukturierte EKG-Befundung
- Langzeit-EKG-Befundung
- Medikamentöse Differentialtherapie von Arrhythmien
- Indikationsstellung zur Schrittmacher- und ICD-Therapie
- Indikationsstellung zur invasiven elektrophysiologischen Untersuchung
- Implantation von Ereignisrekordern
- Implantation von Schrittmachern und ICDs
-

11. In meiner Facharztausbildung zum Kardiologen/zur Kardiologin kann ich zu einem geeigneten Zeitpunkt in rhythmologische Funktionsbereiche rotieren.

- Stimme voll zu                       Stimme eher nicht zu
- Stimme eher zu                       Stimme gar nicht zu
- Kann ich nicht genau sagen

12. Falls Ihre Klinik eine Zusatzqualifikation für "Spezielle Rhythmologie" anbietet – in welchem Weiterbildungsjahr beginnt der/die „Funktions-Assistenzarzt/ärztin Rhythmologie“ mit der Ausbildung?

- 1                      Jahr                      6

13. Folgende Punkte treffen auf meine rhythmologische Ausbildung zu:

- Ausreichendes Teaching bezüglich rhythmologischer Differential-und EKG-Diagnostik
- Ausreichende interne Fortbildungsveranstaltungen gegeben
- Ausreichend Freiraum zur selbstständigen Fort-und Weiterbildung gegeben
- Ausreichende Anzahl an Prozeduren ist für eine adäquate Ausbildung/Erreichung der Zusatzbezeichnungen gegeben
- Hohe Konkurrenz innerhalb der Gruppe der Assistenz- und Fachärzte um invasive rhythmologische Ausbildung

14. In meiner Klinik ist es mir möglich, in der  
Devicetherapie ausgebildet zu werden

- Stimme voll zu                       Stimme eher nicht zu
- Stimme eher zu                       Stimme gar nicht zu
- Kann ich nicht genau sagen

15. In meiner Klinik ist es mir möglich in der invasiven  
Elektrophysiologie ausgebildet zu werden

- Stimme voll zu                       Stimme eher nicht zu
- Stimme eher zu                       Stimme gar nicht zu
- Kann ich nicht genau sagen

16. Mir stehen meiner Meinung nach ausreichend externe  
Fortbildungsmöglichkeiten zum Thema Rhythmologie zur  
Verfügung.

- Stimme voll zu                       Stimme eher nicht zu
- Stimme eher zu                       Stimme gar nicht zu
- Kann ich nicht genau sagen

17. Im Folgenden zeigen wir Ihnen einige organisierte  
Fortbildungsprogramme und möchten wissen, inwiefern  
Ihnen diese bekannt sind bzw. bereits genutzt worden.

1. Sachkurse (HSM/ICD/CRT, EP)

- Ist mir nicht bekannt                       Eine Teilnahme ist bereits  
geplant
- Ist mir bekannt, allerdings  
aktuell nicht interessant für  
mich                       Bereits teilgenommen, war  
nicht zufrieden
- Ist mir bekannt, kann mir  
eine Teilnahme vorstellen                       Bereits teilgenommen, war  
zufrieden

- Würde gerne teilnehmen, allerdings aktuell mit dem beruflichen Alltag nicht vereinbar

## 18. 2. Intensivkurs Interventionelle Elektrophysiologie

- |                                                                                                                |                                                                 |
|----------------------------------------------------------------------------------------------------------------|-----------------------------------------------------------------|
| <input type="radio"/> Ist mir nicht bekannt                                                                    | <input type="radio"/> Eine Teilnahme ist bereits geplant        |
| <input type="radio"/> Ist mir bekannt, allerdings aktuell nicht interessant für mich                           | <input type="radio"/> Bereits teilgenommen, war nicht zufrieden |
| <input type="radio"/> Ist mir bekannt, kann mir eine Teilnahme vorstellen                                      | <input type="radio"/> Bereits teilgenommen, war zufrieden       |
| <input type="radio"/> Würde gerne teilnehmen, allerdings aktuell mit meinem beruflichen Alltag nicht vereinbar |                                                                 |

## 19. 3. Intensivkurs EKG/EPU

- |                                                                                                                |                                                                 |
|----------------------------------------------------------------------------------------------------------------|-----------------------------------------------------------------|
| <input type="radio"/> Ist mir nicht bekannt                                                                    | <input type="radio"/> Eine Teilnahme ist bereits geplant        |
| <input type="radio"/> Ist mir bekannt, allerdings aktuell nicht interessant für mich                           | <input type="radio"/> Bereits teilgenommen, war nicht zufrieden |
| <input type="radio"/> Ist mir bekannt, kann mir eine Teilnahme vorstellen                                      | <input type="radio"/> Bereits teilgenommen, war zufrieden       |
| <input type="radio"/> Würde gerne teilnehmen, allerdings aktuell mit meinem beruflichen Alltag nicht vereinbar |                                                                 |

## 20. 4. E-Learning Plattform der EHRA (ESCeL)

- |                                             |                                                 |
|---------------------------------------------|-------------------------------------------------|
| <input type="radio"/> Ist mir nicht bekannt | <input type="radio"/> Teilnahme bereits geplant |
| <input type="radio"/>                       | <input type="radio"/>                           |

- |                                                                                                                |                                                                 |
|----------------------------------------------------------------------------------------------------------------|-----------------------------------------------------------------|
| <input type="radio"/> Ist mir bekannt, allerdings aktuell nicht interessant für mich                           | <input type="radio"/> Bereits teilgenommen, war nicht zufrieden |
| <input type="radio"/> Ist mir bekannt, kann mir eine Teilnahme vorstellen                                      | <input type="radio"/> Bereits teilgenommen, war zufrieden       |
| <input type="radio"/> Würde gerne teilnehmen, allerdings aktuell mit meinem beruflichen Alltag nicht vereinbar |                                                                 |

#### 21. 5. Fellowship Programme

- |                                                                                                                |                                                                 |
|----------------------------------------------------------------------------------------------------------------|-----------------------------------------------------------------|
| <input type="radio"/> Ist mir nicht bekannt                                                                    | <input type="radio"/> Teilnahme bereits geplant                 |
| <input type="radio"/> Ist mir bekannt, allerdings aktuell nicht interessant für mich                           | <input type="radio"/> Bereits teilgenommen, war nicht zufrieden |
| <input type="radio"/> Ist mir bekannt, kann mir eine Teilnahme vorstellen                                      | <input type="radio"/> Bereits teilgenommen, war zufrieden       |
| <input type="radio"/> Würde gerne teilnehmen, allerdings aktuell mit meinem beruflichen Alltag nicht vereinbar |                                                                 |

22. Insbesondere in diesen Bereichen besteht meiner Meinung nach Optimierungspotenzial für die Ausbildung in der Rhythmologie:

Von Seiten  
meiner  
Klinik:

Von extern:

Fertig
